# Supplementary material for: An experimental heat wave changes immune defense and life history traits in a freshwater snail
Source: PubMed Central journal article supplement (PMC3892353; doi:10.1002/ece3.874), 2013-12-10
Supplement: ece30003-4861-SD2.pdf [file ece30003-4861-SD2.pdf]

**Table S1:** Analysis of covariance (ANCOVA) for the total number of oviposited eggs by water temperature (15°C, 25°C) and exposure time (1, 3, 5, 7, 9, 11 days) using final size as covariate.

| source            | df  | MS       | <i>F</i> | <i>p</i> |
|-------------------|-----|----------|----------|----------|
| temperature (T)   | 1   | 1945.746 | 62.001   | <0.000   |
| exposure time (E) | 5   | 800.178  | 25.498   | <0.000   |
| T × E             | 5   | 70.793   | 2.256    | 0.049    |
| final size        | 1   | 346.268  | 11.034   | 0.001    |
| error             | 299 | 31.382   |          |          |
